# Supplementary material for: Effects of mixtures of ethanol–calcium chloride–carboxymethylcellulose on the bovine milk whey freeze concentration process
Source: Royal Society of Chemistry journal article supplement (doi:10.1039/d2fb00024e), 2022-12-20
Supplement: d2fb00024e1.pdf [file d2fb00024e1.pdf]

SUPPLEMENTARY MATERIAL

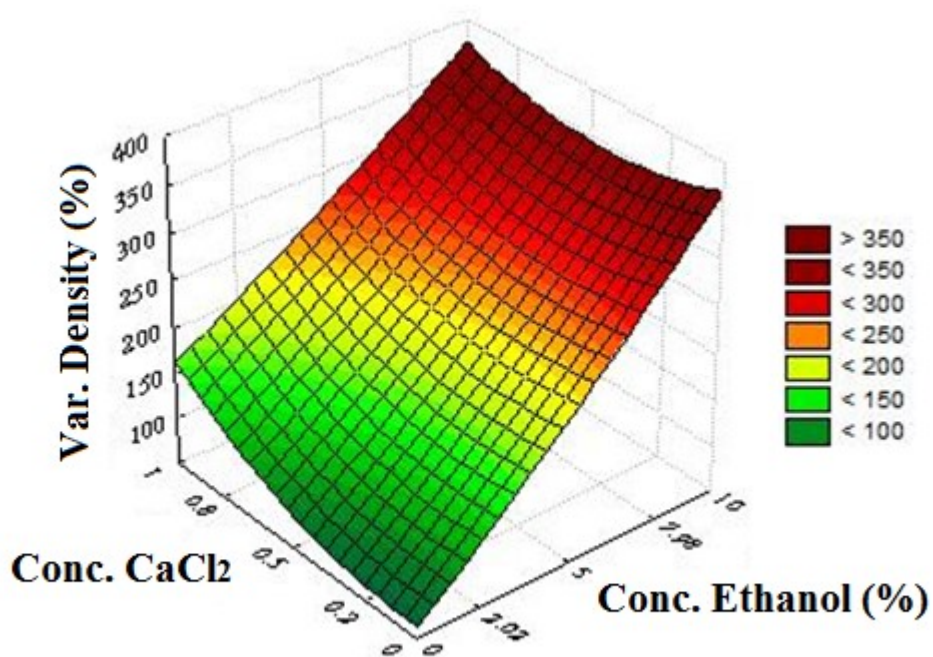

(a)

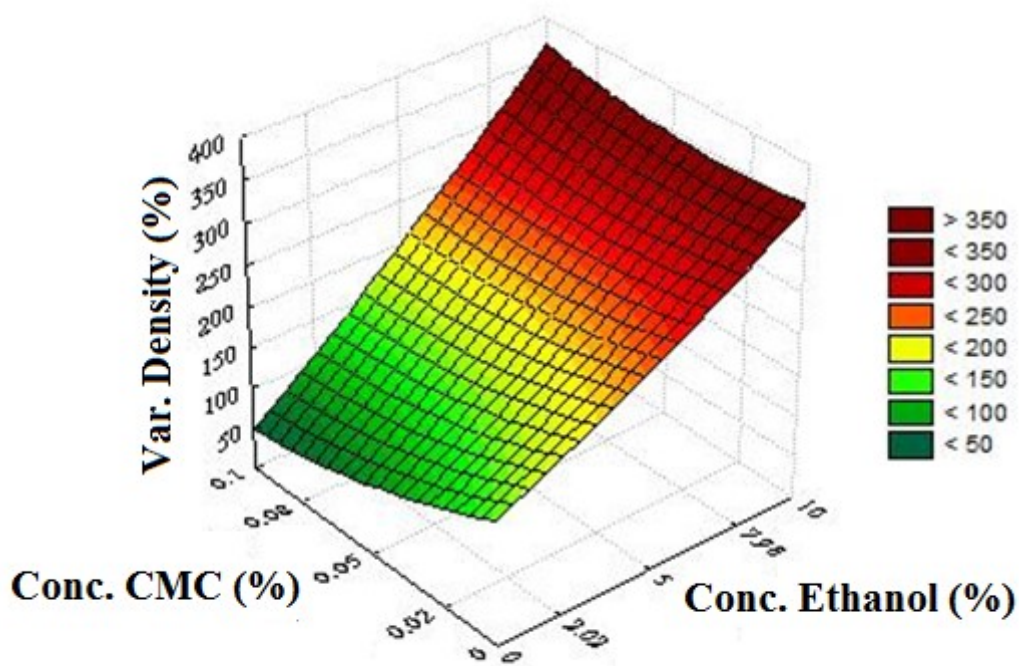

(b)

Figure 1S - Response surface for the variation in the density of concentrate 1 (a) as a function of the concentration of ethanol and CaCl<sub>2</sub> and, (b) as a function of the concentration of ethanol, and CMC.

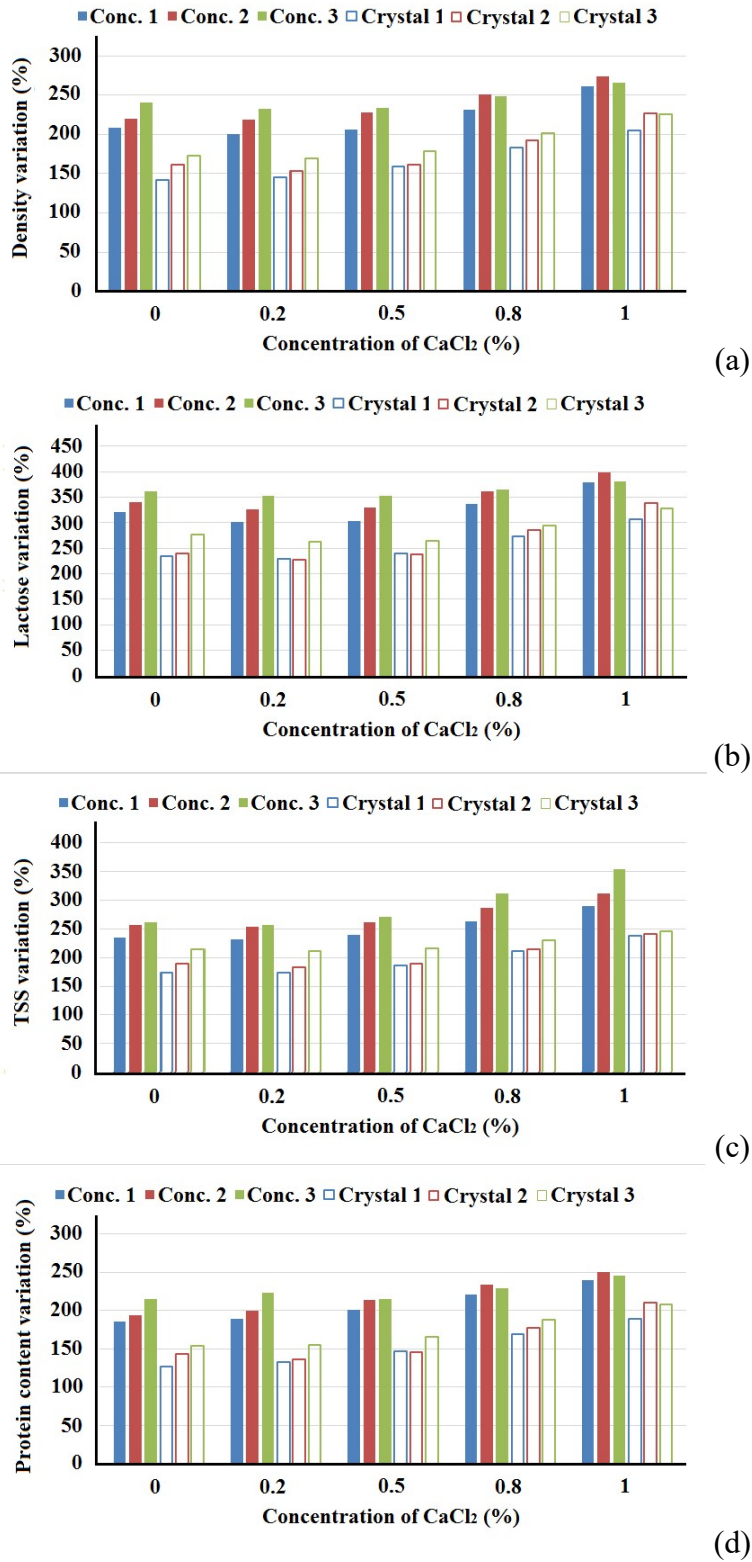

**Figure 2S** - Behavior of response variables (a) density, (b) lactose content, (c) soluble solids content and (d) protein content as a function of the concentration of CaCl<sub>2</sub>, 5 % of ethanol

and 0.05% CMC in Concentrates and Ice Crystals separated in Stages 1, 2 and 3 of the freezing concentration process.

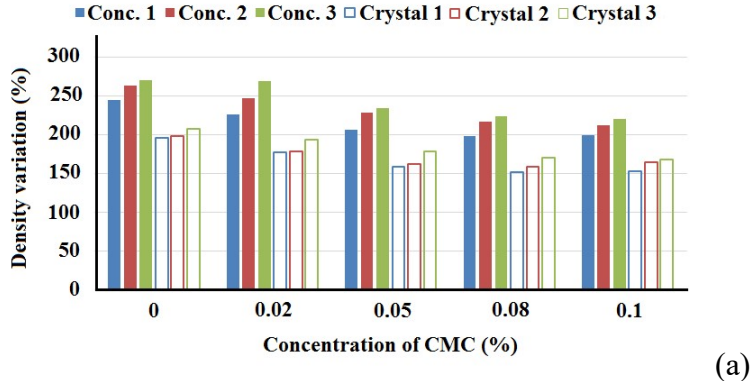

(a)

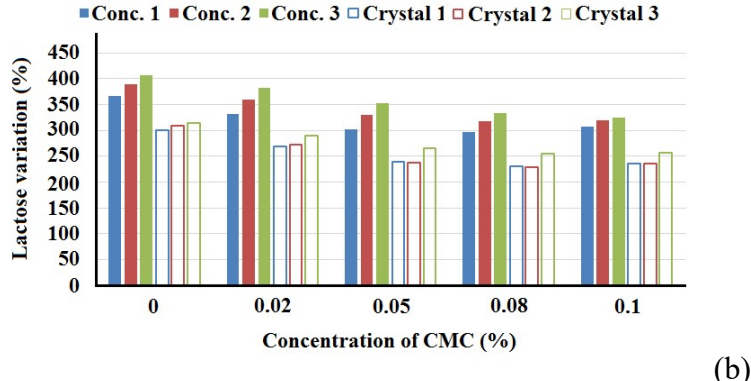

(b)

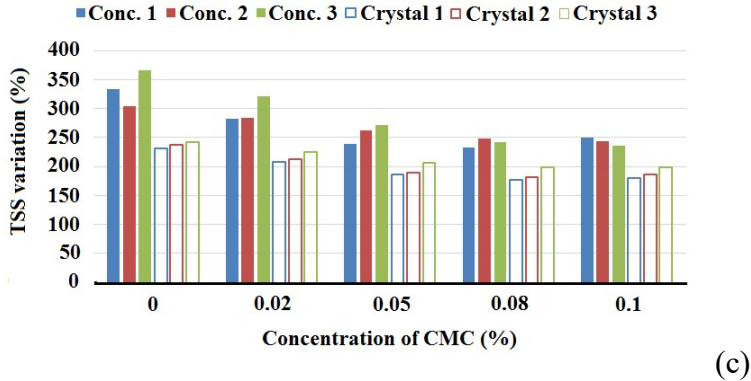

(c)

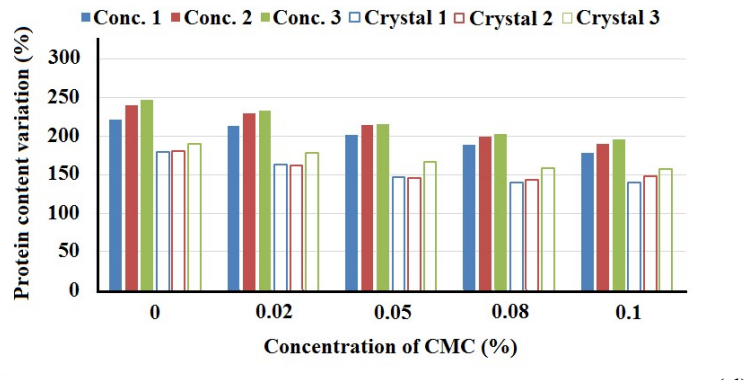

(d)

**Figure 3S** - Behavior of response variables (a) density, (b) lactose content, (c) soluble solids content and (d) protein content as a function of CMC concentration, 5% ethanol and 0.5%

CaCl<sub>2</sub> in the Concentrates and Ice Crystals separated in Stages 1, 2 and 3 of the freezing concentration process.

**Table 15** - Regression results of the rotational central composite design (RCCD) for protein partition coefficient in the stage 1 and stage 2 of the BMW freeze-concentration.

| Protein partition coefficient – K (-) |                        |           |                        |           |
|---------------------------------------|------------------------|-----------|------------------------|-----------|
|                                       | Stage 1                |           | Stage 2                |           |
|                                       | Regression coefficient | p         | Regression coefficient | P         |
| <b>β<sub>0</sub></b>                  | 0,843167               | 0,000000* | 0,782233               | 0,000000* |
| <b>β<sub>1</sub></b>                  | 0,060382               | 0,000286* | 0,072853               | 0,000054* |
| <b>β<sub>11</sub></b>                 | -0,012795              | 0,240102  | -0,004834              | 0,616912  |
| <b>β<sub>2</sub></b>                  | 0,021510               | 0,049228* | 0,024676               | 0,021715* |
| <b>β<sub>22</sub></b>                 | -0,010705              | 0,318438  | 0,024326               | 0,033754* |
| <b>β<sub>3</sub></b>                  | -0,002378              | 0,800449  | 0,005285               | 0,548906  |
| <b>β<sub>33</sub></b>                 | 0,007695               | 0,465376  | 0,019117               | 0,077295  |
| <b>β<sub>12</sub></b>                 | -0,003139              | 0,798421  | -0,018057              | 0,143636  |
| <b>β<sub>13</sub></b>                 | 0,012201               | 0,336789  | 0,006793               | 0,555248  |
| <b>β<sub>23</sub></b>                 | -0,009315              | 0,456941  | -0,011915              | 0,313263  |
| <b>R<sup>2</sup></b>                  | 0.8890                 |           | 0.934                  |           |
| <b>F</b>                              | 6,2310                 |           | 1,1508                 |           |

\* Significant at the level of 5% probability (p<0.05).

Legend: β<sub>0</sub> = is a constant term; β<sub>1</sub> = Ethanol (%); β<sub>11</sub> = (Ethanol (%))<sup>2</sup>; β<sub>2</sub> = CaCl<sub>2</sub> (%); β<sub>22</sub> = (CaCl<sub>2</sub> (%))<sup>2</sup>; β<sub>3</sub> = CMC (%); β<sub>33</sub> = (CMC (%))<sup>2</sup>; β<sub>12</sub> = Ethanol (%) × CaCl<sub>2</sub> (%); β<sub>13</sub> = Ethanol (%) × CMC (%); β<sub>23</sub> CaCl<sub>2</sub> (%) × CMC (%).

**Table 25** - ANOVA results of the rotational central composite design (RCCD) for protein partition coefficient in the stage 3 of the BMW freeze-concentration.

| ANOVA - Protein partition coefficient – K (-), stage 3 |          |    |          |          |          |
|--------------------------------------------------------|----------|----|----------|----------|----------|
|                                                        | SS       | df | MS       | F        | p        |
| <b>β<sub>0</sub></b>                                   | 0,033760 | 1  | 0,033760 | 9,528442 | 0,017646 |
| <b>β<sub>1</sub></b>                                   | 0,001117 | 1  | 0,001117 | 0,315125 | 0,592061 |
| <b>β<sub>11</sub></b>                                  | 0,010757 | 1  | 0,010757 | 3,036121 | 0,124962 |
| <b>β<sub>2</sub></b>                                   | 0,000322 | 1  | 0,000322 | 0,090953 | 0,771731 |
| <b>β<sub>22</sub></b>                                  | 0,002973 | 1  | 0,002973 | 0,839058 | 0,390131 |
| <b>β<sub>3</sub></b>                                   | 0,000391 | 1  | 0,000391 | 0,110438 | 0,749376 |
| <b>β<sub>33</sub></b>                                  | 0,011953 | 1  | 0,011953 | 3,373553 | 0,108867 |
| <b>β<sub>12</sub></b>                                  | 0,002245 | 1  | 0,002245 | 0,633620 | 0,452175 |
| <b>β<sub>13</sub></b>                                  | 0,005115 | 1  | 0,005115 | 1,443736 | 0,268606 |
| Error                                                  | 0,024801 | 7  | 0,003543 |          |          |
| Total SS                                               | 0,092867 | 16 |          |          |          |
| R <sup>2</sup> = 0.73294                               |          |    |          |          |          |
|                                                        | SS       | df | MS       | F        | p        |
| Regression                                             | 0,068066 | 9  | 0,0076   | 2,1346   | 0,1649   |
| Error                                                  | 0,024801 | 7  | 0,003543 |          |          |
| Total SS                                               | 0,092867 | 16 |          |          |          |

Legend: β<sub>0</sub> = is a constant term; β<sub>1</sub> = Ethanol (%); β<sub>11</sub> = (Ethanol (%))<sup>2</sup>; β<sub>2</sub> = CaCl<sub>2</sub> (%); β<sub>22</sub> = (CaCl<sub>2</sub> (%))<sup>2</sup>; β<sub>3</sub> = CMC (%); β<sub>33</sub> = (CMC (%))<sup>2</sup>; β<sub>12</sub> = Ethanol (%) × CaCl<sub>2</sub> (%); β<sub>13</sub> = Ethanol (%) × CMC (%); β<sub>23</sub> CaCl<sub>2</sub> (%) × CMC (%).

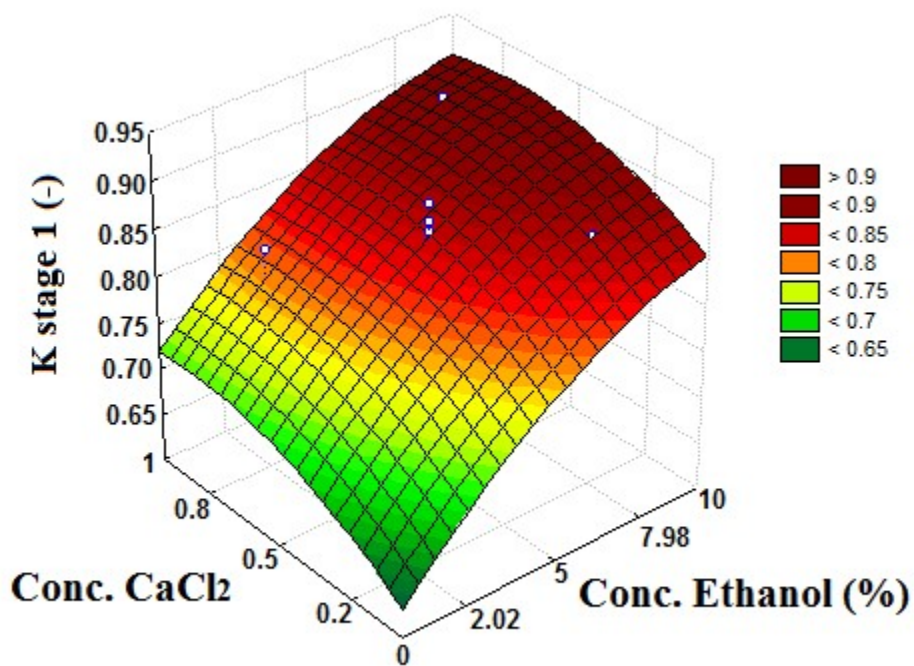

(a)

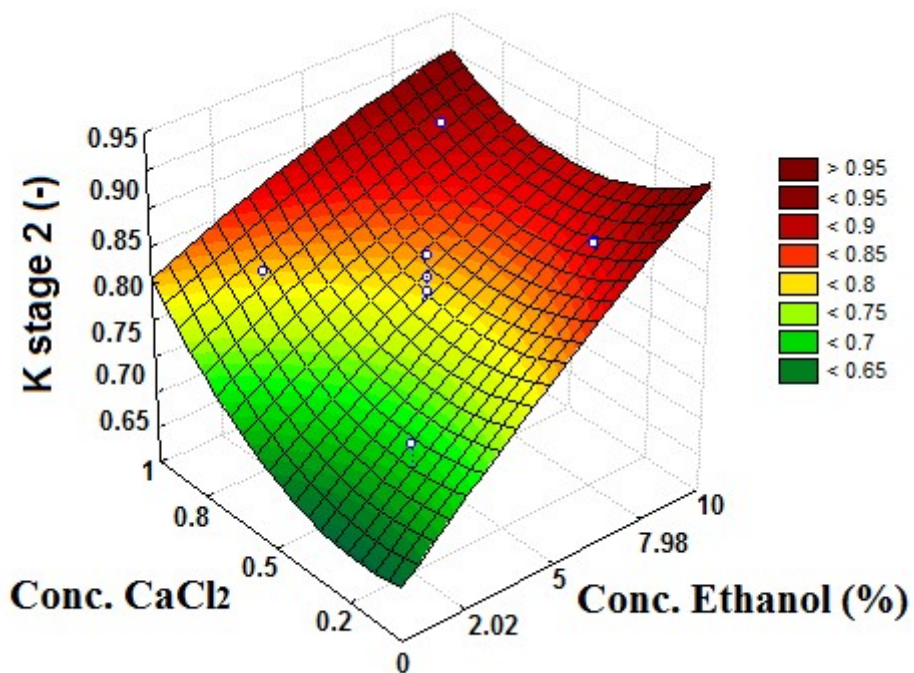

(b)

**Figure 4S** - Response surfaces of the protein partition coefficients (K) for (a) stage 1 and (b) stage 2.

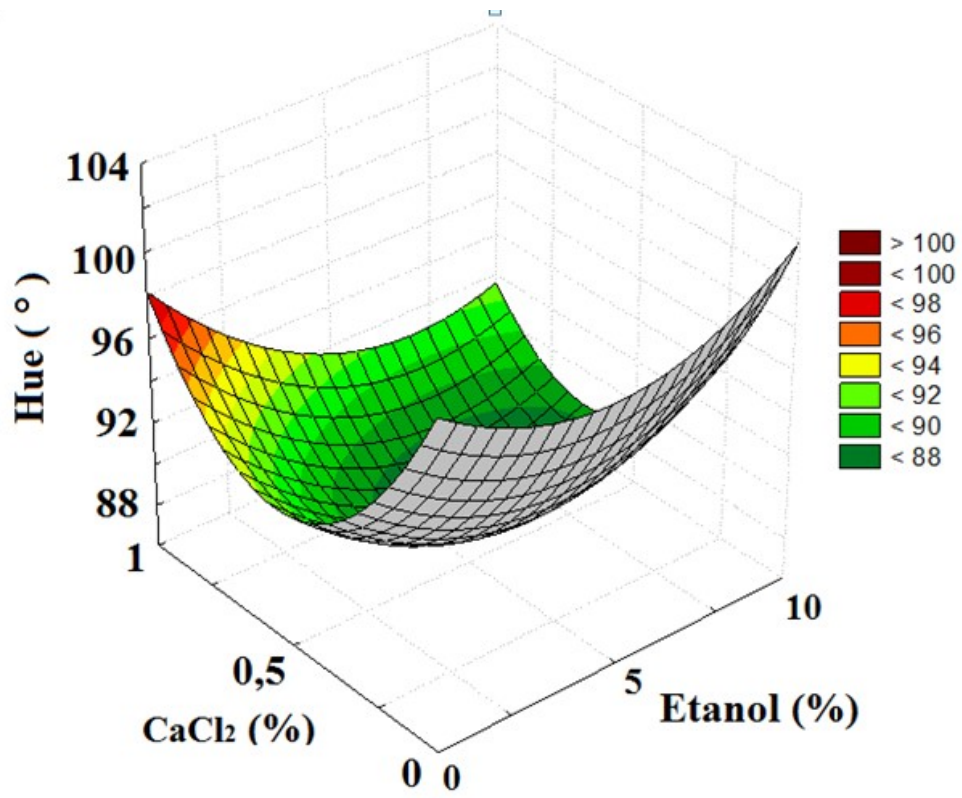

(a)

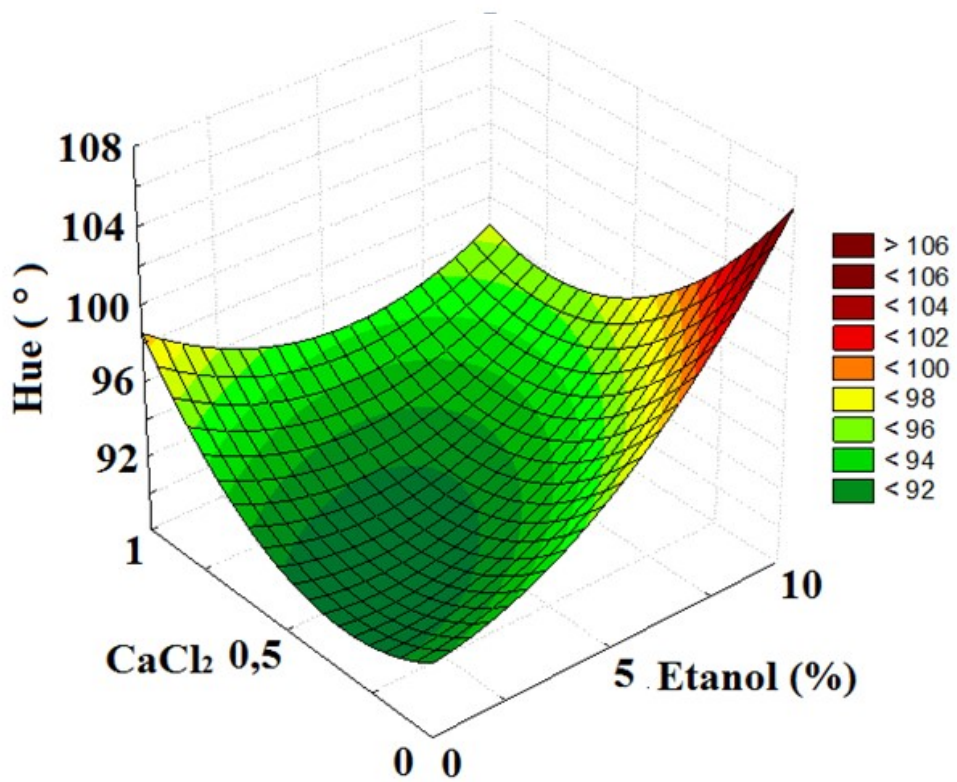

(b)

**Figure 5S** - Response surfaces of the Hue angle variable for (a) concentrate 2 and (b) ice crystal 3.
